# Supplementary material for: AGR3 in Breast Cancer: Prognostic Impact and Suitable Serum-Based Biomarker for Early Cancer Detection
Source: PLoS One. 2015 Apr 15;10(4):e0122106. doi: 10.1371/journal.pone.0122106 (PMC4398490; doi:10.1371/journal.pone.0122106)
Supplement: S7 Table — (DOC) [file pone.0122106.s007.doc]

| **S7 Table: Clinico-pathological parameters in relation to *AGR3* mRNA expressiona** | | | | |
| --- | --- | --- | --- | --- |
| **Parameter** | **nb** | ***AGR3* high** | ***AGR3* low** | **P-valuec** |
| Total | 62 | 33 (53.2%) | 29 (46.8%) | - |
|  |  |  |  |  |
|  |  |  |  |  |
| Age at diagnosis |  |  |  |  |
| <63,5 years | 31 | 16 (51.6%) | 15 (48.4%) |  |
| ≥63,5 years | 31 | 17 (54.8%) | 14 (45.2%) | 1.000 |
| Tumour sized |  |  |  |  |
| pT1 | 35 | 21 (60.0%) | 14 (40.0%) |  |
| pT2-3 | 27 | 12 (44.4%) | 15 (55.6%) | 0.306 |
| Lymph node statusd |  |  |  |  |
| pN0 | 34 | 16 (47.1%) | 18 (52.9%) |  |
| pN1-3 | 27 | 16 (59.3%) | 11 (40.7%) | 0.441 |
| Histological tumour gradee |  |  |  |  |
| G1-2 | 23 | 18 (78.3%) | 5 (21.7%) |  |
| G3 | 38 | 14 (36.8%) | 24 (63.2%) | **0.003** |
| Histological type |  |  |  |  |
| invasive ductal | 55 | 28 (50.9%) | 27(49.1%) |  |
| invasive lobular | 5 | 4 (80.0%) | 1 (20.0%) | 0.359 |
| Oestrogen receptor status |  |  |  |  |
| negative (IRSf 0-2) | 18 | 0 (0.0%) | 18 (100.0%) |  |
| positive (IRSf 3-12) | 42 | 32 (76.2%) | 10 (23.8%) | **<0.001** |
| Progesterone receptor status |  |  |  |  |
| negative (IRSf 0-2) | 20 | 2 (10.0%) | 18 (90.0%) |  |
| positive (IRSf 3-12) | 39 | 30 (76.9%) | 9 (23.1%) | **<0.001** |
| HER2 statusg |  |  |  |  |
| negative | 53 | 31 (58.5%) | 22 (41.5%) |  |
| positive | 8 | 2 (25.0%) | 6 (75.0%) | 0.127 |
| a*AGR3* high expression: ≥ 2 fold change in relation to median normal breast tissue expression. bOnly female patients with primary, unilateral, invasive breast cancer were included. cFisher’s exact test. dAccording to TNM classification by Sobin and Wittekind [58]. eAccording to Bloom and Richardson, as modified by Elston and Ellis [32]. fImmunoreactive score (IRS) according to Remmele and Stegner [30]. Significant P-values are marked in bold face. gOverexpression of the *ERBB2* gene (Her-2/neu) was diagnosed analogously to the threshold of the DAKO-Score system based on IHC assay. Uncertain cases were additionally validated by FISH assay. Percentages may not sum-up to 100% due to rounding. | | | | |
